# Supplementary material for: Phosphorylated 5-ethynyl-2′-deoxyuridine for advanced DNA labeling
Source: Royal Society of Chemistry journal article supplement (doi:10.1039/c5ob00199d), 2015-01-01
Supplement: c5ob00199d1.pdf [file c5ob00199d1.pdf]

## Electronic Supplementary Information

for

### Phosphorylated 5-ethynyl-2'-deoxyuridine for advanced DNA labeling

Siyoong Seo<sup>a,b</sup>, Kazumitsu Onizuka<sup>a</sup>, Chieko Nishioka<sup>c</sup>, Eiki Takahashi<sup>c</sup>, Satoshi Tsuneda<sup>b</sup>,  
Hiroshi Abe<sup>a,d\*</sup> and Yoshihiro Ito<sup>a,b,d\*</sup>,

<sup>a</sup>Nano Medical Engineering Laboratory, RIKEN, 2-1 Hirosawa, Wako, Saitama 351-0198, Japan

<sup>b</sup>Department of Life Science and Medical Bio-Science, Waseda University, 3-4-1 Ohkubo, Shinjuku-ku, Tokyo  
169-8555, Japan

<sup>c</sup>Support Unit for Animal Experiment, Research Resources Center, RIKEN Brain Science Institute, 2-1  
Hirosawa, Wako-shi, Saitama 351-0198, Japan

<sup>d</sup>Emergent Bioengineering Materials Research Team, RIKEN Center for Emergent Matter Science, 2-1  
Hirosawa, Wako, Saitama 351-0198, Japan

1. Glycosidic bond hydrolysis by pyrimidine phosphorylases generates 5-ethynyluracil, itself a toxic antimetabolite

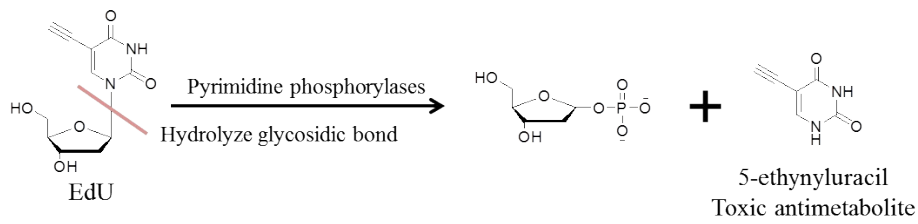

2. EdUMP which is generated from EdU inhibits dTMP synthesis

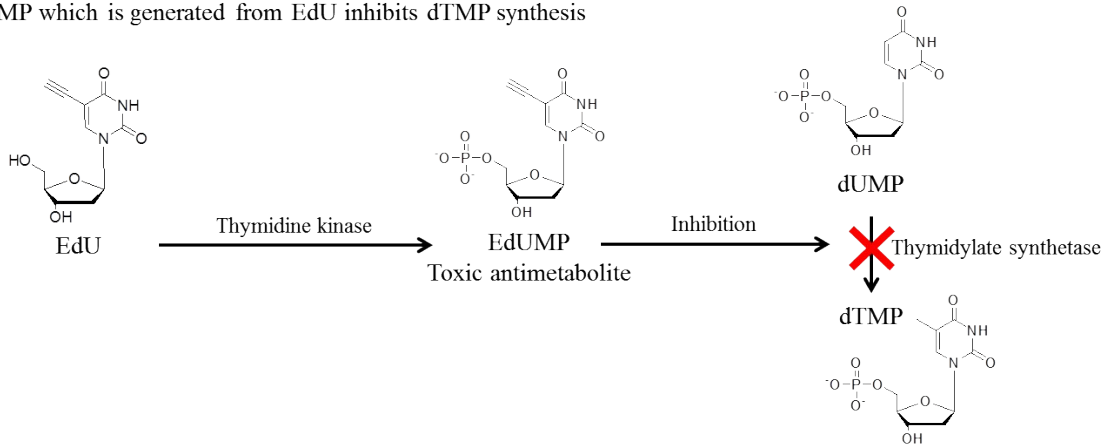

Figure S1. Cytotoxic pathways of EdU.

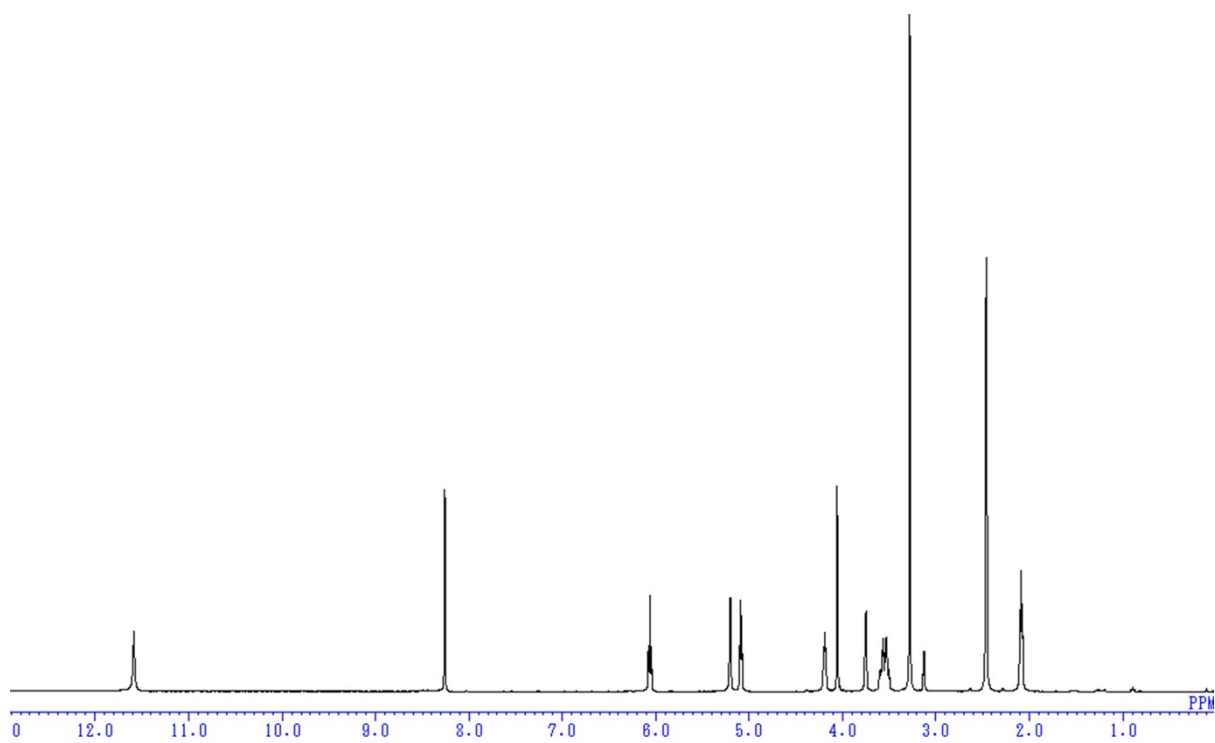

Figure S2. <sup>1</sup>H NMR spectrum (400 MHz) of EdU(1) in DMSO at 25 °C.

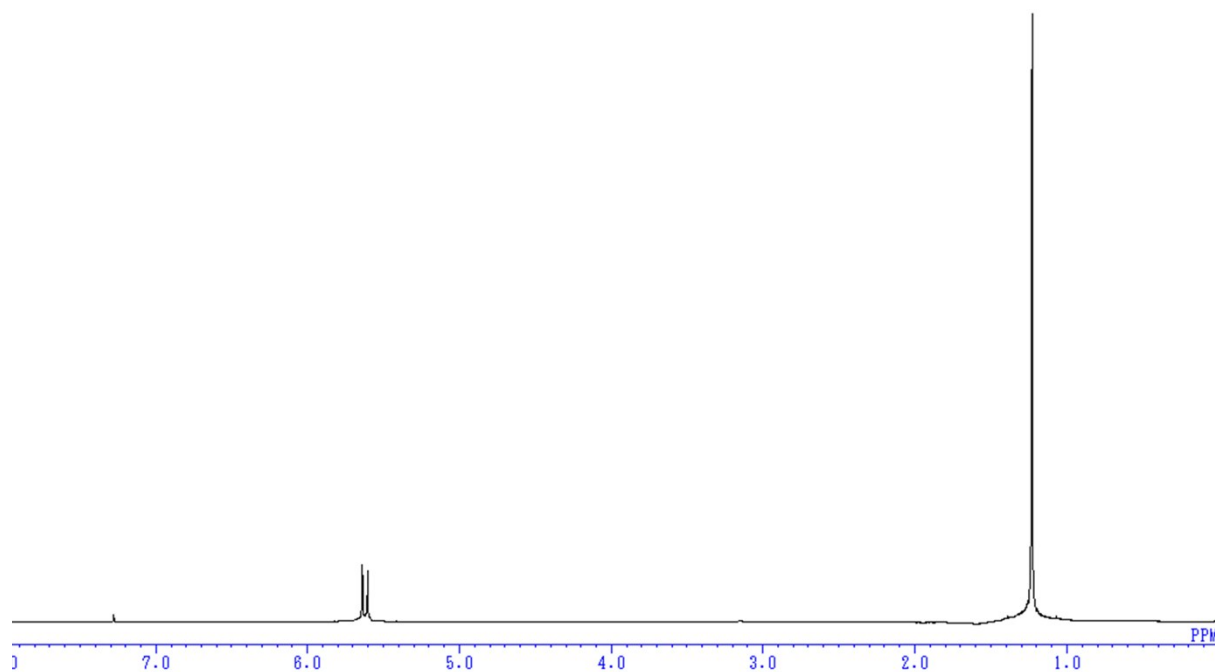

Figure S3. <sup>1</sup>H NMR spectrum (400 MHz) of chlorobis(POM) phosphate(2) in CDCl<sub>3</sub> at 25 °C.

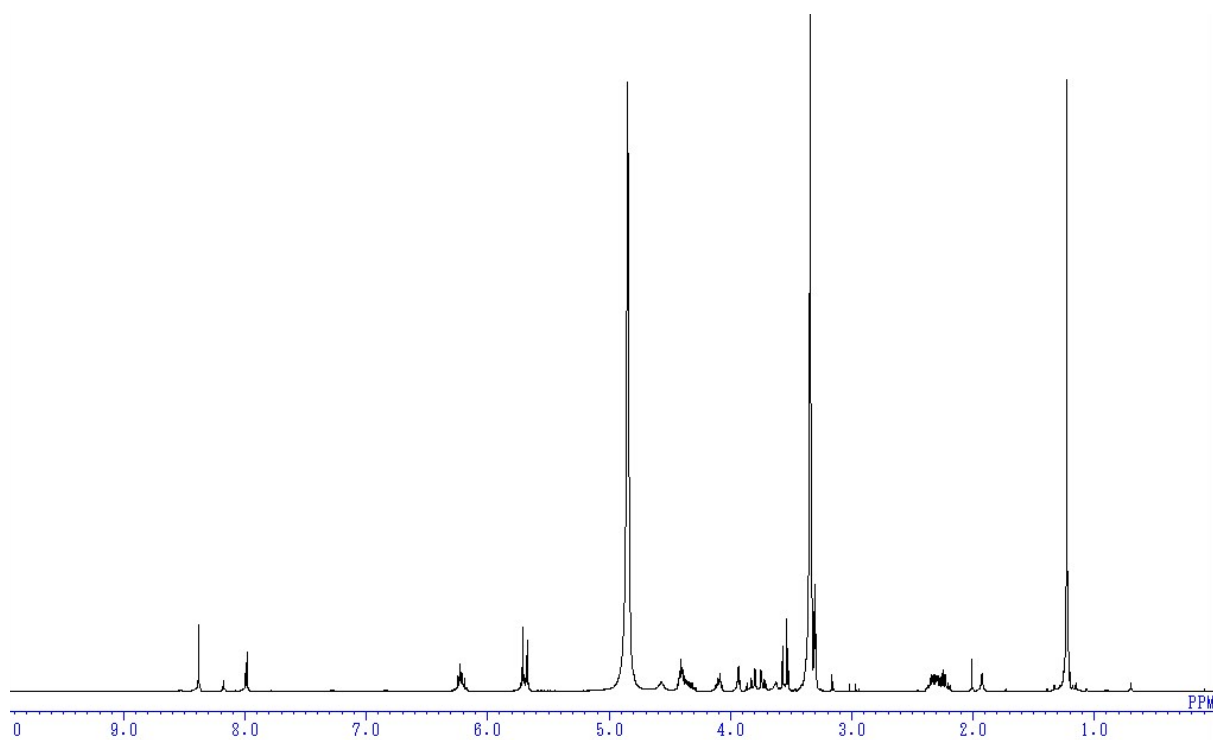

Figure S4.  $^1\text{H}$  NMR spectrum (400 MHz) of PEdU(3) in  $\text{CD}_3\text{OD}$  at  $25\text{ }^\circ\text{C}$ .

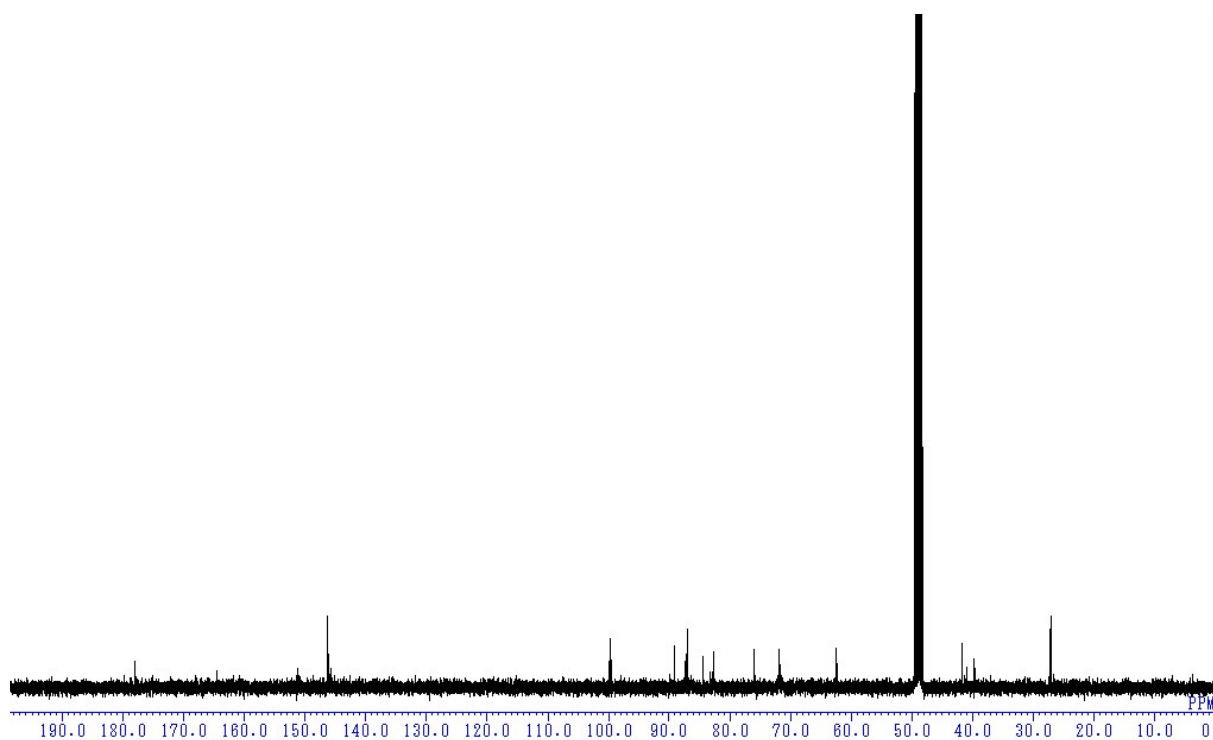

Figure S5.  $^{13}\text{C}$  NMR spectrum (400 MHz) of PEdU(3) in  $\text{CD}_3\text{OD}$  at  $25\text{ }^\circ\text{C}$ .

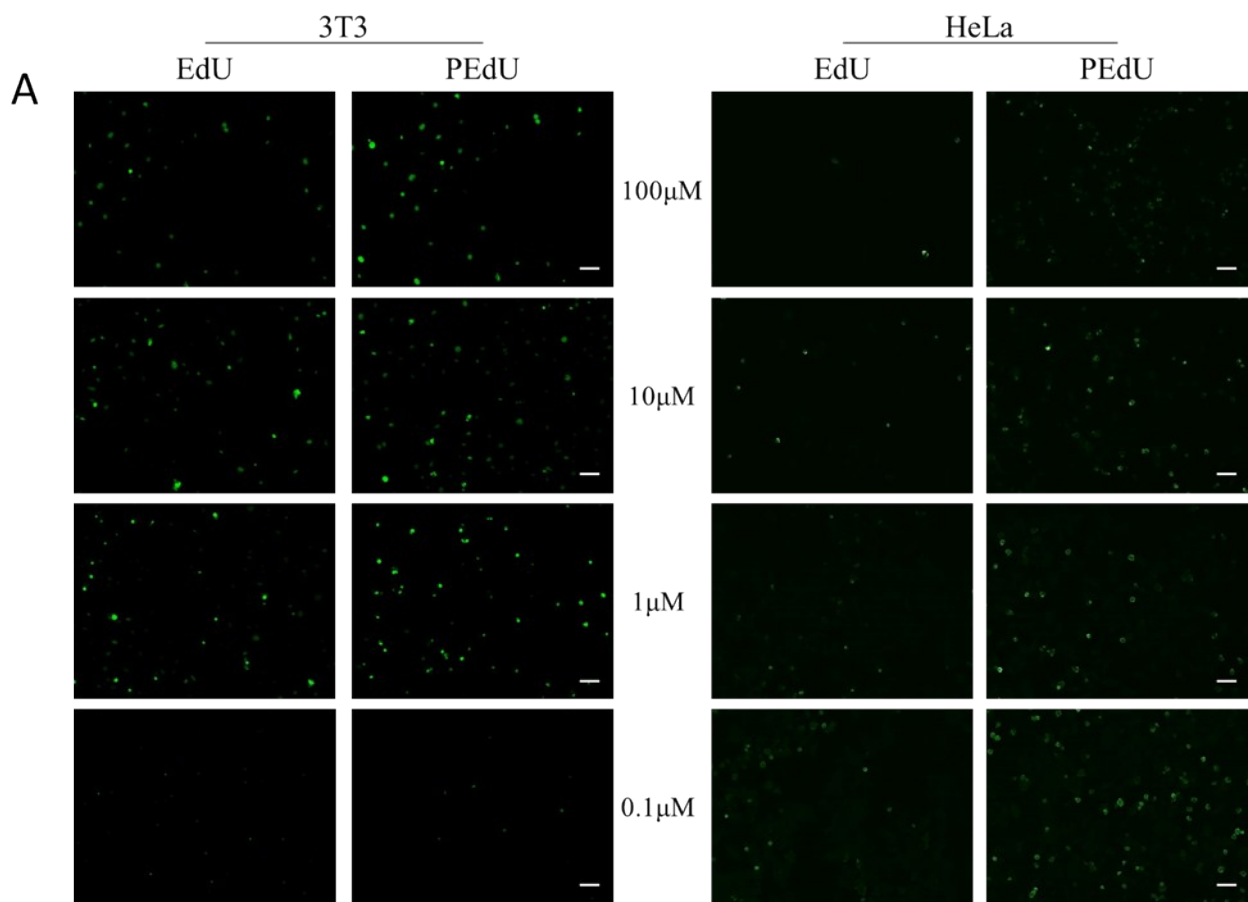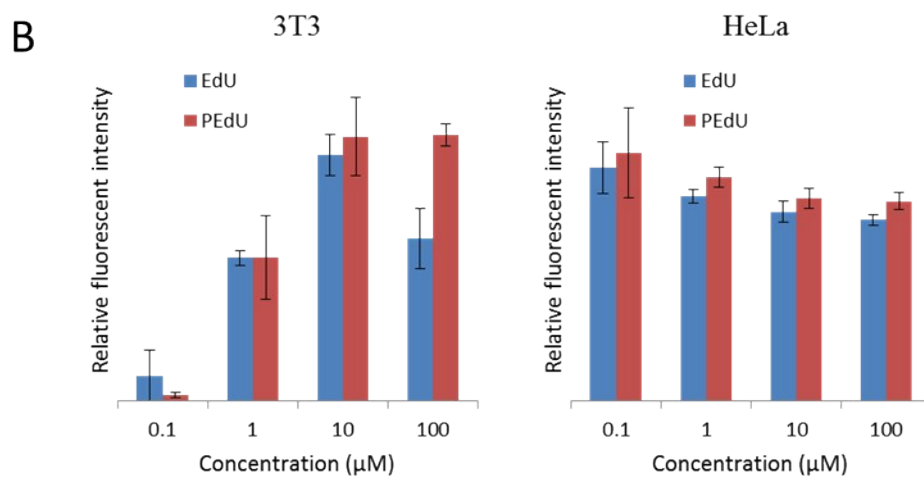

Figure S6. Metabolic labeling of DNA in 3T3 and HeLa cells at various concentrations (0.1–100 µM) of EdU or PEdU. After 72 h, incorporated DNA was stained with Alexa Fluor 488 azide (A). Scale bar: 50 µm. The relative fluorescence intensity was measured using image analysis software (B). n=4

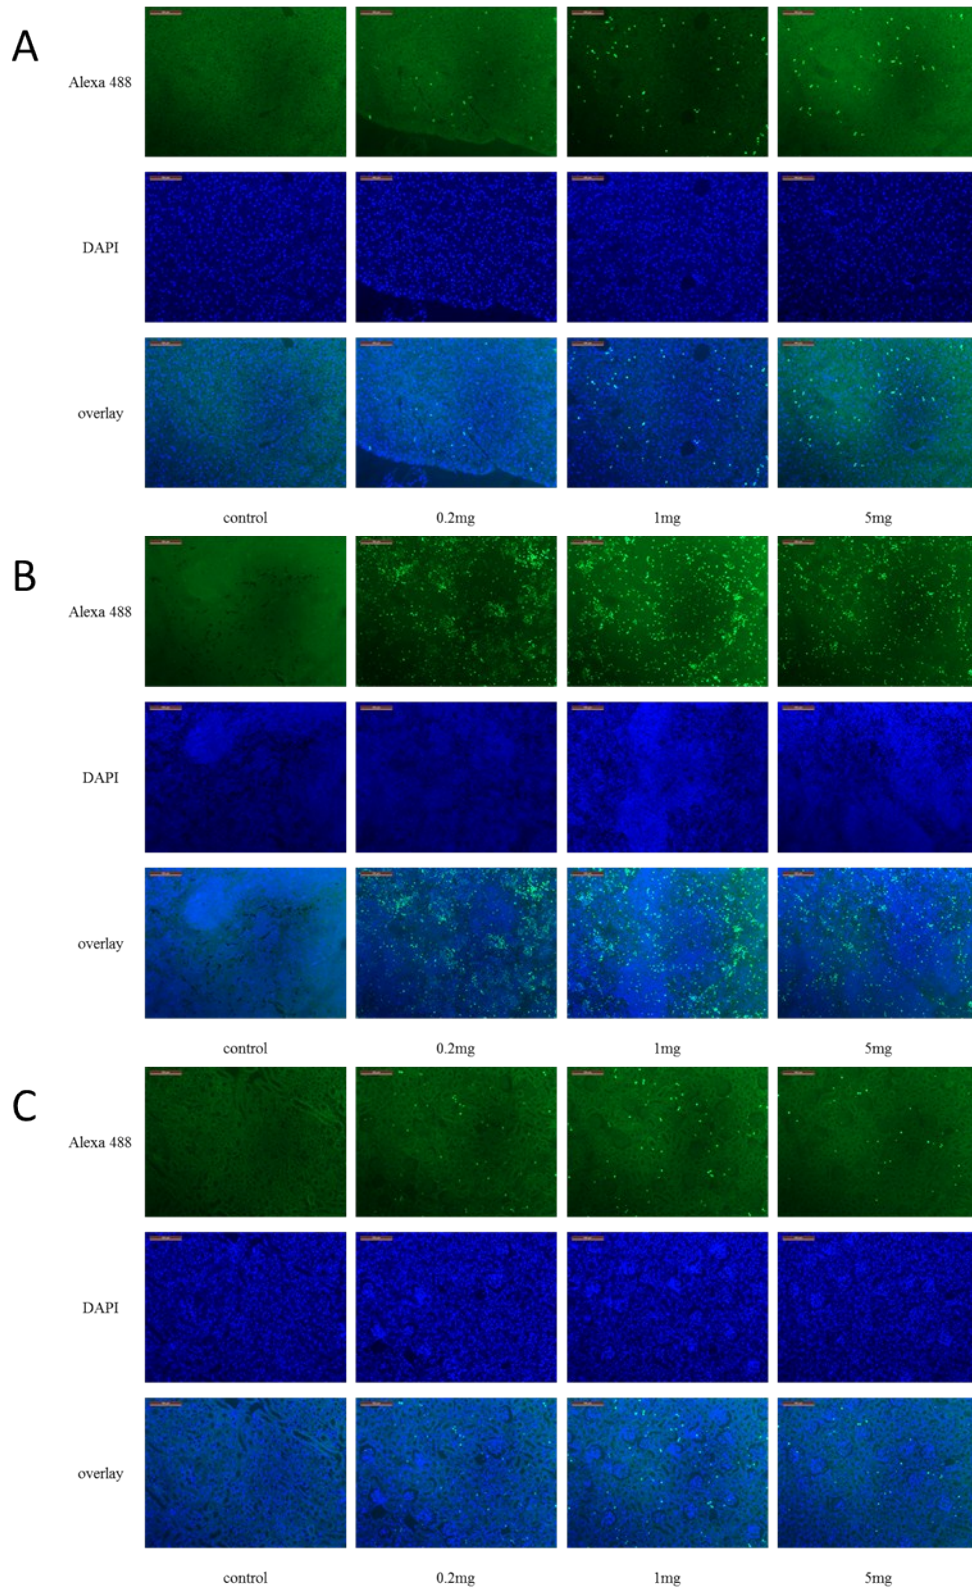

Figure S7. Mice were injected i.p. with 0.2, 1 or 5 mg PEdu. After 24 h, livers (A), spleens (B) and kidneys (C) were harvested. Sections from the organs were fixed and stained with Alexa Fluor 488 azide. Total DNA was stained with DAPI. Scale bar: 100  $\mu$ m.

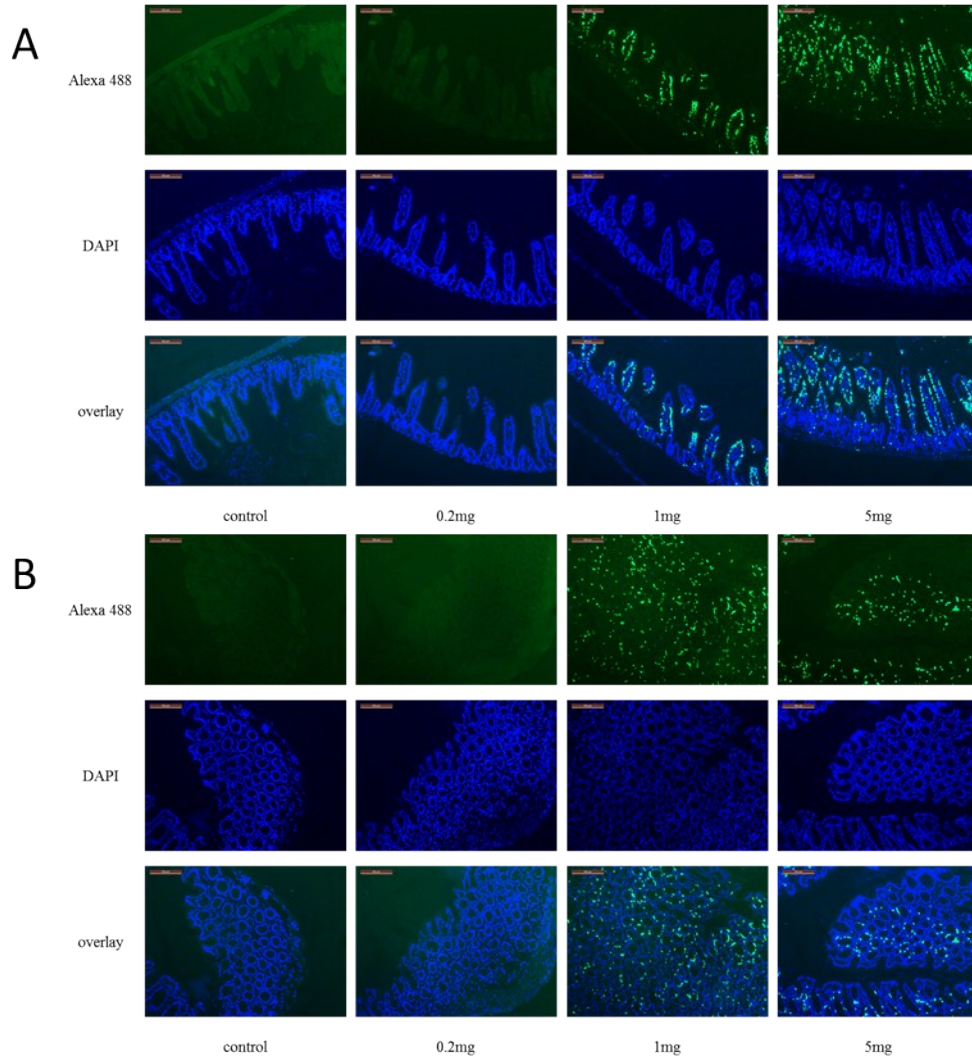

Figure S8. Mice were injected i.p. with 0.2, 1 or 5 mg PEdU. After **48 h**, ileums (A) and colons (B) were harvested. Sections from the organs were fixed and stained with Alexa Fluor 488 azide. Total DNA was stained with DAPI. Scale bar: 100  $\mu\text{m}$ .



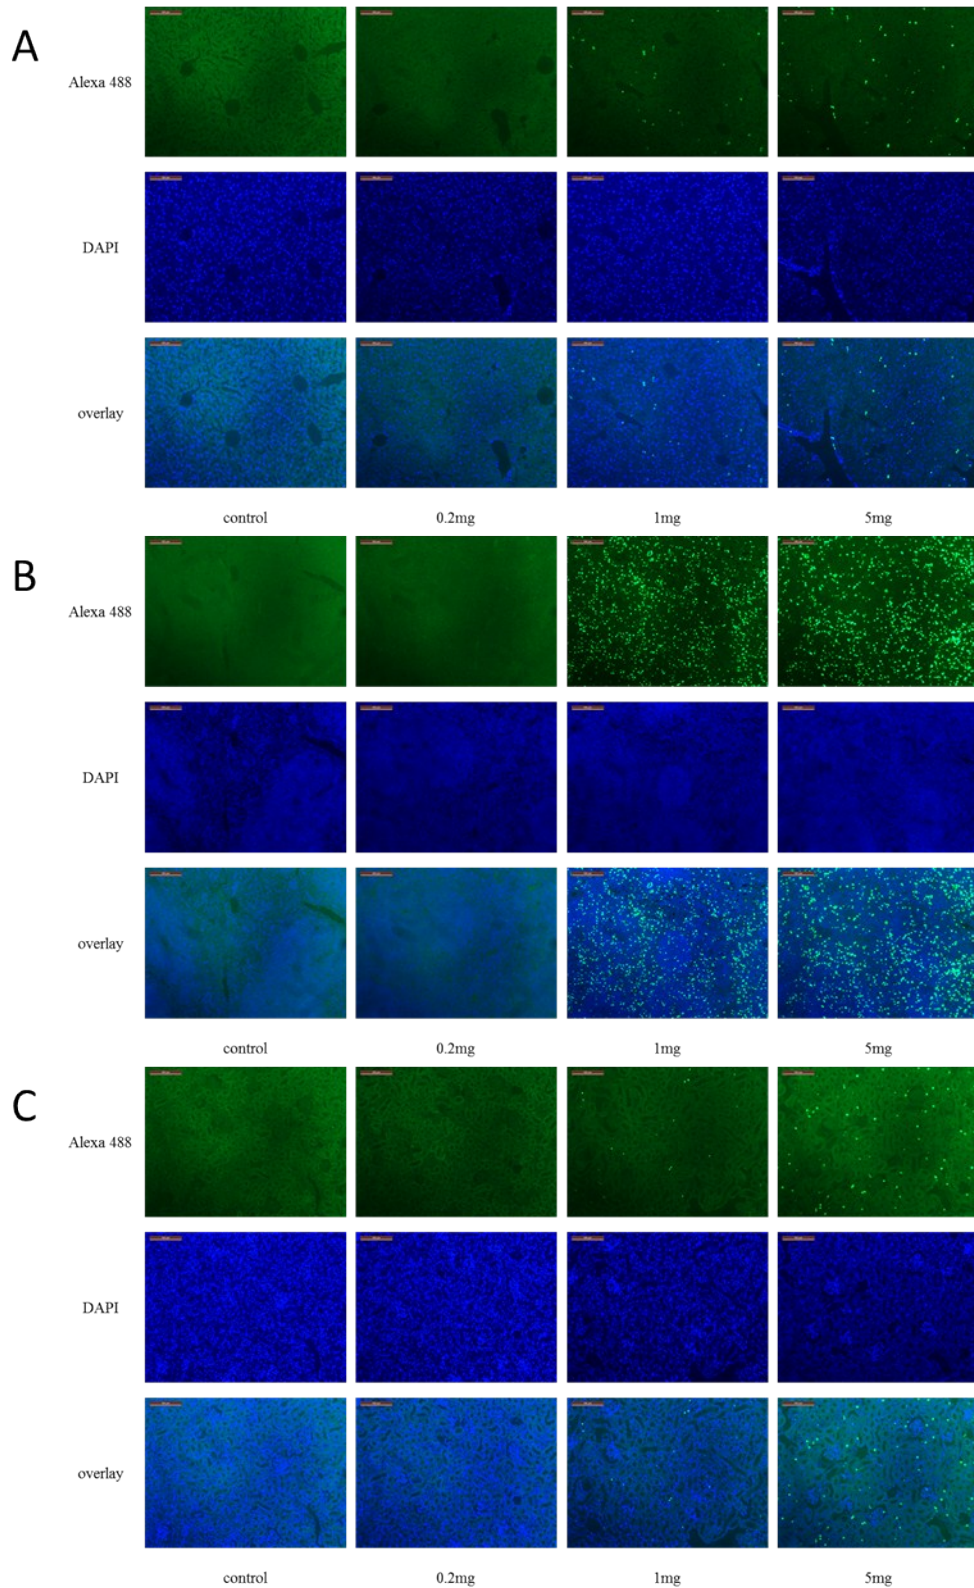

Figure S9. Mice were injected i.p. with 0.2, 1 or 5 mg PEdu. After 48 h, livers (A), spleens (B) and kidneys (C) were harvested. Sections from the organs were fixed and stained with Alexa Fluor 488 azide. Total DNA was stained with DAPI. Scale bar: 100  $\mu$ m.
